# Supplementary material
Source: ML conference proceedings conference paper supplement (https://proceedings.neurips.cc/paper_files/paper/2020/hash/befe5b0172188ad14d48c3ebe9cf76bf-Abstract.html)
Supplement: Supplementary file [file befe5b0172188ad14d48c3ebe9cf76bf-Supplemental.zip]

## Appendices

### A Proof of Lemma 2

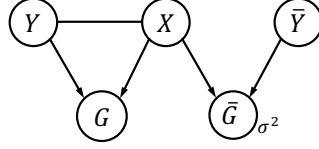

Figure 3: PGM representation for Lemma 2.

**Lemma 2.** Consider random variables  $X, Y, \bar{Y}, G$  and  $\bar{G}$  with the conditional independences presented in the Bayesian network of Fig. 3. Also suppose that  $P_{\bar{Y}} = P_Y$  and  $P_{\bar{G}}^{X, \bar{Y}} = P_G^{X, Y}$ .

(a) If the marginal distribution  $P_{\bar{G}}$  is  $\sigma$ -subgaussian, then

$$|\mathbb{E}[\bar{G} - G]| \leq \sqrt{2\sigma^2 I(X; Y)}. \quad (\text{A.1})$$

(b) If  $P_G^x$  is  $\sigma$ -subgaussian for all  $x \in \mathcal{X}$ , then

$$\Pr \{u \times (\bar{G} - G) \geq \epsilon\} \leq \frac{4\sigma^2(I(X; Y) + 1)}{\epsilon^2} ; \quad u \in \{-1, 1\}, \epsilon \in \mathbb{R}_+. \quad (\text{A.2})$$

*Proof.* For Part (a), a slight modification of proof of Lemma 1 in [21] is used. Based on the Donsker–Varadhan variational representation of the relative entropy, for any two distributions  $\pi, \rho$  on a common measurable space  $(\Omega, \mathcal{F})$  we have

$$\text{KL}(\pi \parallel \mu) = \sup_F \left\{ \int_{\Omega} F d\pi - \log \int_{\Omega} e^F d\rho \right\} \quad (\text{A.3})$$

where supremum is over all measurable functions  $F : \Omega \rightarrow \mathbb{R}$ , such that  $e^F \in L^1(\rho)$ . Consider the distribution  $\pi = P_{XYG} = P_{XY} \otimes P_G^{XY}$  and let  $\mu = P_{X\bar{Y}\bar{G}} = P_X \otimes P_Y \otimes P_{\bar{G}}^{XY}$ . Note that  $\mathbb{E}[G]$  and  $\mathbb{E}[\bar{G}]$  are calculated based on  $\pi$  and  $\mu$ , respectively. Define the function  $f(x, y, g) = g$ . For all  $\lambda \in \mathbb{R}$ , we have

$$\begin{aligned} \text{KL}(\pi \parallel \mu) &\geq \mathbb{E}[\lambda f(X, Y, G)] - \log \mathbb{E}[e^{\lambda f(X, Y, \bar{G})}] \\ &= \lambda(\mathbb{E}[G] - \log \mathbb{E}[e^{\lambda \bar{G}}]) \\ &\geq \lambda(\mathbb{E}[G] - \mathbb{E}[\bar{G}]) - \frac{\lambda^2 \sigma^2}{2}, \end{aligned} \quad (\text{A.4})$$

where the final inequality is due to the  $\sigma$ -subgaussian assumption on  $P_{\bar{G}}$

$$\log \mathbb{E}[e^{\lambda(G - \mathbb{E}[G])}] \leq \lambda^2 \sigma^2 / 2; \quad \forall \lambda \in \mathbb{R}.$$

The inequality (A.4) gives a nonnegative parabola in  $\lambda$ . For the inequality to hold for all  $\lambda$ , the discriminant of this parabola must be nonpositive. This implies that

$$|\mathbb{E}[\bar{G}] - \mathbb{E}[G]| \leq \sqrt{2\sigma^2 \text{KL}(\pi \parallel \mu)}. \quad (\text{A.5})$$

Now noting that

$$\text{KL}(\pi \parallel \mu) = \text{KL}(P_{XY} \otimes P_G^{XY} \parallel P_X \otimes P_Y \otimes P_{\bar{G}}^{XY}) \quad (\text{A.6})$$

$$= \text{KL}(P_{XY} \parallel P_X \otimes P_Y) \quad (\text{A.7})$$

$$= I(X; Y) \quad (\text{A.8})$$

concludes the proof of Part (a).

To prove Part (b), first consider that  $u = 1$ , for  $u = -1$  the proof follows similarly. Let us first restate a lemma from [6].

**Lemma A.1** ([6]). *Let  $\pi$  and  $\mu$  be distributions on a set  $\Omega$  and let  $E \subseteq \Omega$ . Then,*

$$\pi(E) \leq \frac{\text{KL}(\pi \parallel \mu) + 1}{\log(1/\mu(E))}. \quad (\text{A.9})$$

Proving Part (b) requires a stronger technique based on an auxiliary distribution. Let  $\pi$  be the distribution presented in Fig. 3, i.e.  $\pi = P_{XYG\bar{Y}\bar{G}} = P_{XY} \otimes P_G^{XY} \otimes P_Y \otimes P_G^{XY}$ . Consider another distribution  $\mu$  which is similar to  $\pi$  except that the link between  $X$  and  $Y$  is severed, i.e.  $\mu = P_{X'Y'G'\bar{Y}'\bar{G}'} = P_X \otimes P_Y \otimes P_G^{XY} \otimes P_Y \otimes P_G^{XY}$ . Note that again we have  $\text{KL}(\pi \parallel \mu) = I(X; Y)$ .

Let  $H' = \bar{G}' - G'$  and  $E$  be the event that  $H' \geq \epsilon$ . To find  $\mu(E)$ , note that when  $X' = x'$  is given,  $G'$  and  $\bar{G}'$  are independent random variables each having the same distributions as  $P_G^x$ . As this distribution is assumed to be  $\sigma$ -subgaussian, for an arbitrary  $x' \in \mathcal{X}$ , we have

$$\mathbb{E}^{x'}[e^{\lambda(\bar{G}' - G' - (\mathbb{E}^{x'}[\bar{G}' - G'])})] = \mathbb{E}^{x'}[e^{\lambda(\bar{G}' - \mathbb{E}^{x'}[\bar{G}'])}] \mathbb{E}^{x'}[e^{\lambda(G' - \mathbb{E}^{x'}[G'])}] \leq e^{\lambda^2 \sigma^2}; \forall \lambda \in \mathbb{R}. \quad (\text{A.10})$$

This means that the conditional distribution  $P_{H'}^{x'}$  is subgaussian with the variance proxy  $2\sigma^2$ . Also note that  $\mathbb{E}^{x'}[\bar{G}' - G'] = 0$ . Now, by using the well known fact that the tail of any subgaussian distribution around its mean, is dominated by the Gaussian distribution with the same variance proxy, we have

$$\Pr^{x'}\{H' \geq \epsilon\} \leq e^{-\frac{\epsilon^2}{4\sigma^2}}. \quad (\text{A.11})$$

Since this is valid for all  $x'$ , by taking expectation from both sides we have

$$\mu(E) = \Pr\{H' \geq \epsilon\} = \mathbb{E}_{X'}[\Pr^{X'}\{H' \geq \epsilon\}] \leq e^{-\frac{\epsilon^2}{4\sigma^2}}. \quad (\text{A.12})$$

Now that a bound on  $\mu(E)$  is found, Lemma A.1 can be used to control  $\pi(E) = \Pr\{\bar{G} - G \geq \epsilon\}$ . We have

$$\pi(E) \leq \frac{\text{KL}(\pi \parallel \mu) + 1}{\log(1/\mu(E))} \leq \frac{4\sigma^2(I(X; Y) + 1)}{\epsilon^2}. \quad (\text{A.13})$$

□

## B Proof of Lemma 3

**Lemma 3.** (Conditioning) *Consider random variables  $X, Y, Z, H$ .*

(a) *Suppose there is a concave function  $b : \mathbb{R}_+ \rightarrow \mathbb{R}$  which satisfies*

$$\forall z \in \mathcal{Z}; \mathbb{E}^z[H] \leq b(I^z(X; Y)), \quad (\text{B.1})$$

*then*

$$\mathbb{E}[H] \leq \mathbb{E}_Z[b(I^Z(X; Y))] \quad (\text{B.2})$$

$$\leq b(I(X; Y|Z)). \quad (\text{B.3})$$

(b) *Suppose there is a function  $\delta : \mathbb{R}_+ \times \mathbb{R} \rightarrow \mathbb{R}$  which is concave on its first argument and satisfies*

$$\forall z \in \mathcal{Z}, \epsilon \in \mathbb{R}_+; \Pr^z[H \geq \epsilon] \leq \delta(I^z(X; Y), \epsilon),$$

*then*

$$\Pr[H \geq \epsilon] \leq \delta(I(X; Y|Z), \epsilon). \quad (\text{B.4})$$

*Proof.* (a) Note that  $E[H] = E_Z[E^Z[H]]$ . Since inequality (B.1) holds for all  $z \in \mathcal{Z}$ , by taking expectation on  $Z$  from the random upper bound  $b(I^Z(X; Y))$ , the inequality (B.2) is achieved. Inequality (B.3) is a consequence of the concavity of  $b$ , the Jensen's inequality, and the definition of conditional mutual information.

(b) This part follows similarly by noting that for any event  $E$  we have  $\mathbb{E}_Z[\Pr^Z\{E\}] = \Pr\{E\}$ . □

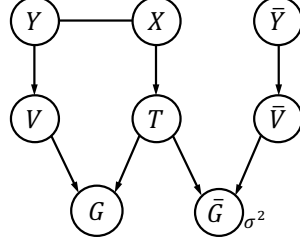

Figure 4: PGM representation of processing technique.

## C Proof of Theorem 4

**Theorem 4** ([9]). *If the random variables  $X, Y$  and  $Z$  form a Markov chain (in any order), then*

$$I(X; Y|Z) \leq I(X; Y). \quad (\text{C.1})$$

*Proof.* Suppose the conditional dependences of  $X, Y$  and  $Z$  satisfies a Markov chain  $V_1 - V_2 - V_3$  where  $V_i \in \{X, Y, Z\}$  and  $(V_i)_{i=1}^3$  is a specific ordering of  $(X, Y, Z)$ . The Markov property results in  $V_1 \perp\!\!\!\perp V_3|V_2$ . If  $V_2 = Z$ ,  $I(X; Y|Z) = I(V_1; V_3|V_2) = 0$  has the smallest possible value and thus (C.1) is satisfied. If  $V_2 \neq Z$  either  $V_2 = X$  or  $V_2 = Y$ . Because of the symmetry between  $X$  and  $Y$ , it is enough to consider either of these cases and the other follows similarly. Suppose  $V_2 = X$ , i.e.  $Z \perp\!\!\!\perp Y|X$ . By chain rule of mutual information, the quantity  $I(Y; (X, Z))$  can be decomposed in two ways and we have

$$I(Y; (X, Z)) = I(Y; Z) + I(Y; X|Z) = I(Y; X) + I(Y; Z|X). \quad (\text{C.2})$$

Since  $I(Y; Z|X) = 0$ , we have

$$I(X; Y|Z) = I(X; Y) - I(Y; Z). \quad (\text{C.3})$$

Thus, (C.1) is obtained according to the nonnegativity of  $I(Y; Z)$ .  $\square$

## D Proof of Lemma 5

**Lemma 5.** (Processing) *Consider random variables  $X, Y, \bar{Y}, G, \bar{G}, V, \bar{V}$  and  $T$  with the conditional independences presented in the Bayesian network of Fig. 4. Also suppose that  $P_{\bar{Y}} = P_Y$ ,  $P_V^Y = P_{\bar{V}}^{\bar{Y}}$  and  $P_G^{T,V} = P_{\bar{G}}^{T,\bar{V}}$ .*

(a) *If the marginal distribution  $P_{\bar{G}}$  is  $\sigma$ -subgaussian, then*

$$|\mathbb{E}[\bar{G} - G]| \leq \sqrt{2\sigma^2 I(T; V)}. \quad (\text{D.1})$$

(b) *If  $P_{\bar{G}}^t$  is  $\sigma$ -subgaussian for all  $t \in \mathcal{T}$ , we have*

$$\Pr \{u \times (\bar{G} - G) \geq \epsilon\} \leq \frac{4\sigma^2(I(T; V) + 1)}{\epsilon^2} ; \quad u \in \{-1, 1\}. \quad (\text{D.2})$$

*Proof.* Note that  $\bar{V} \perp\!\!\!\perp (T, V)$  and marginal distributions  $P_V$  and  $P_{\bar{V}}$  are the same, because  $P_Y = P_{\bar{Y}}$  and  $P_V^Y = P_{\bar{V}}^{\bar{Y}}$ . The result easily is obtained as the conditions of Lemma 2 are satisfied for random variables  $T, V, \bar{V}, G$  and  $\bar{G}$ .  $\square$

## E A Unified View on Information-Theoretic Generalization Bounds

In this section results provided in Section 4.1 are proved and discussed. Recall that we assumed for all  $w$  the loss function  $\ell(w, X)$  is  $\sigma_\ell$ -subgaussian. For binary classification with zero-one loss  $\sigma_\ell = 1/2$ . We also defined  $L_j = \ell(W, S_j)$ ,  $L'_j = \ell(W, S'_j)$ ,  $R = 1/n \sum_{j=1}^n L_j$  and  $R' = 1/n \sum_{j=1}^n L'_j$ . Note that  $R'$  is  $\sigma_\ell^2/n$ -subgaussian since  $L'_j$ s are independent. The object of interest is generalization

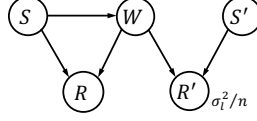

Figure 5: Basic generalization.

gap of hypothesis  $w$ , which is the difference between the expected loss and the average loss on training set

$$\text{gen}(w) = \mathbb{E}_{XY}[\ell(w, (X, Y))] - \frac{1}{n} \sum_{j=1}^n \ell(w, S_j). \quad (\text{E.1})$$

We want to have bounds on  $\text{gen}(\mu, P_W^S) \triangleq \mathbb{E}[\text{gen}(w)]$  and  $\Pr\{\text{gen}(w) \geq \epsilon\}; \epsilon \in \mathbb{R}_+$ .

### E.1 Basic Generalization Bound

Considering the conditional independences presented in Fig. 5, using Lemma 2 directly results in

$$\text{gen}(\mu, P_W^S) = |\mathbb{E}[R' - R]| \leq \sqrt{\frac{2\sigma_\ell^2}{n} I(S; W)}, \quad (\text{E.2})$$

and

$$\Pr\{R' - R \geq \epsilon\} \leq \frac{4\sigma_\ell^2(I(S; W) + 1)}{n\epsilon^2}. \quad (\text{E.3})$$

In Section 4.1, we saw that  $E[R' - R]$  in the original formulation is equal to  $\text{gen}(\mu, P_W^S)$ . But the situation is different for  $\Pr\{\text{gen}(W) \geq \epsilon\}$  because now the variance also matters. Next theorem proves that for the large enough  $N$  this difference just introduces a constant factor to the bound.

**Theorem E.1.** *If  $N \geq \frac{2}{\epsilon^2}$  we have*

$$\Pr\{\text{gen}(W) \geq \epsilon\} \leq 2 \Pr\{R' - R \geq \epsilon/2\}. \quad (\text{E.4})$$

*Proof.* The result follows by a standard technique in proving generalization bound that introduces an auxiliary ghost sample set (for example see Appendix A.1 of [1]). Define  $e_\mu(W) = \mathbb{E}_{XY}[\ell(W, (X, Y))]$ . If  $\Pr\{e_\mu(W) - R \geq \epsilon\} = 0$ , the desired inequality holds. Assume  $\Pr\{e_\mu(W) - R \geq \epsilon\} > 0$ , we have

$$\begin{aligned} \Pr\{R' - R \geq \frac{\epsilon}{2}\} &\geq \Pr\{R' - R \geq \epsilon/2 \text{ and } e_\mu(W) - R \geq \epsilon\} \\ &= \Pr\{R' - R \geq \frac{\epsilon}{2} \mid e_\mu(W) - R \geq \epsilon\} \Pr\{e_\mu(W) - R \geq \epsilon\} \\ &\geq \Pr\{e_\mu(W) - R' \leq \frac{\epsilon}{2} \mid e_\mu(W) - R \geq \epsilon\} \Pr\{e_\mu(W) - R \geq \epsilon\} \\ &\geq (1 - e^{-\frac{1}{2}\epsilon^2 n}) \Pr\{e_\mu(W) - R \geq \epsilon\}. \end{aligned} \quad (\text{E.5})$$

First inequality holds because taking intersection with another event, does not increase probability. The second inequality is obtained since when  $e_\mu(W) - R \geq \epsilon$  and  $e_\mu(W) - R' \leq \frac{\epsilon}{2}$  it is guaranteed that  $R' - R \geq \frac{\epsilon}{2}$ . In the final inequality, Hoeffding's bound is used, which is possible because  $W$  is independent of  $S'$ .  $\square$

Using Theorem E.1 we have

$$\Pr\{\text{gen}(W) \geq \epsilon\} \leq \frac{32\sigma_\ell^2(I(S; W) + 1)}{n\epsilon^2}.$$

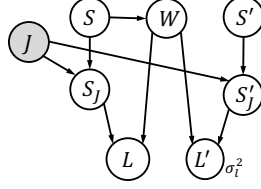

Figure 6: Conditioning on sample index.

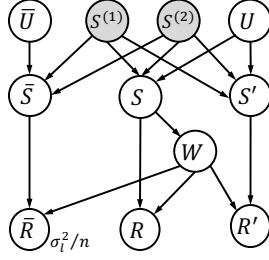

Figure 7: Conditioning on the super sample.

## E.2 Conditioning on Sample Index

Considering Fig. 6, by conditioning on  $J$ , and processing  $S \rightarrow S_J$  we have

$$\begin{aligned} \text{gen}(\mu, P_W^S) &= \mathbb{E}[L' - L] \\ &\leq |\mathbb{E}[L' - L]| \\ &\leq \mathbb{E}_J[\sqrt{2\sigma_\ell^2 I(S_J; W)}] \\ &= \frac{1}{n} \sum_{j=1}^n \sqrt{2\sigma_\ell^2 I(S_j; W)} \end{aligned} \quad (\text{E.6})$$

$$\leq \sqrt{2\sigma_\ell^2 I(S_J; W)}. \quad (\text{E.7})$$

Here it is assumed that  $W$  is independent of the order of samples in  $S$  and thus  $I(S_J; W|J) = I(S_J; W)$ . In Section 4.1, we saw that  $\mathbb{E}[L' - L]$  is one of the equivalent ways to compute  $\text{gen}(\mu, P_W^S)$ , and no further corrections is needed.

## E.3 Conditioning on the Super Sample

Considering Fig. 7, by conditioning on  $S^{(1)}, S^{(2)}$  we have

$$|\mathbb{E}[\bar{R} - R]| \leq \sqrt{\frac{2\sigma_\ell^2}{n} I(U; W|S^{(1)}, S^{(2)})}, \quad (\text{E.8})$$

and

$$\Pr\{\bar{R} - R \geq \epsilon\} \leq \frac{4\sigma_\ell^2 (I(U; W|S^{(1)}, S^{(2)}) + 1)}{n\epsilon^2}. \quad (\text{E.9})$$

Note that here we had to use another branch for random variables  $\bar{U}$ ,  $\bar{S}$  and  $\bar{R}$  to have the required conditional independence. Moreover, we assumed that the input distribution  $\mu$  is continuous, thus  $S^{(1)} \cup S^{(2)}$  is a set of  $2n$  distinct random variables. As a result, when  $S^{(1)} \cup S^{(2)}$  is given, knowing  $S$  is the same as knowing  $U$  and  $I(S; W|S^{(1)}, S^{(2)}) = I(U; W|S^{(1)}, S^{(2)})$ . Also note that the discussion on Section 4.1 demonstrated that the distribution of  $R$  and  $R'$  is the same as in Section E.1. Next theorem shows the relation between the obtained bounds and generalization error.

**Theorem E.2.** *In the setting represented in Fig. 7, we have*

$$\text{gen}(\mu, P_W^S) = 2\mathbb{E}[\bar{R} - R]. \quad (\text{E.10})$$

Moreover, if zero-one loss is used and  $N \geq \frac{64}{\epsilon^2}$ , we have

$$\Pr\{\text{gen}(W) \geq \epsilon\} \leq 4 \times \frac{I(U; W|S^{(1)}, S^{(2)}) + 1}{n(\epsilon/8)^2} \quad (\text{E.11})$$

*Proof.* Define  $e_\mu(W) = \mathbb{E}_{XY}[\ell(W, (X, Y))]$  and  $e_{\hat{\mu}(W)} = \frac{1}{2n} \sum_{(x_i, y_i) \in S^{(1)}, S^{(2)}} \ell(W, (x_i, y_i))$ . Note that  $e_{\hat{\mu}(W)} = \frac{1}{2}(R + R')$ . For expectation of generalization gap, we have

$$\begin{aligned} \text{gen}(\mu, P_W^S) &= \mathbb{E}[R' - R] \\ &= \mathbb{E}[2(e_{\hat{\mu}(W)} - R)] \\ &= 2\mathbb{E}[\bar{R} - R], \end{aligned} \quad (\text{E.12})$$

where final equality is due to the fact that  $\bar{R}$  is an unbiased estimator for  $e_{\hat{\mu}(W)}$ , calculated using  $n$  samples from  $\hat{\mu}$ .

For the tail bound we have

$$\begin{aligned} \Pr\{\text{gen}(W) \geq \epsilon\} &\leq 2\Pr\{R' - R \geq \epsilon/2\} \\ &= 2\Pr\{e_{\hat{\mu}(W)} - R \geq \epsilon/4\} \\ &= 2\Pr\{e_{\hat{\mu}(W)} - \bar{R} + (\bar{R} - R) \geq \epsilon/4\} \\ &\leq 2\Pr\{e_{\hat{\mu}(W)} - \bar{R} \geq \epsilon/8\} + \Pr\{\bar{R} - R \geq \epsilon/8\} \\ &\leq 2\left(2e^{-2n(\frac{\epsilon}{8})^2} + \Pr\{\bar{R} - R \geq \epsilon/8\}\right) \end{aligned} \quad (\text{E.13})$$

First inequality is based on Theorem E.1. The next equality is based on the algebraic relation  $e_{\hat{\mu}(W)} = \frac{1}{2}(R + R')$ . In second inequality we used union bound and the mathematical relation  $A + B \geq c \Rightarrow (A \geq \frac{c}{2}) \vee (B \geq \frac{c}{2})$ . In third inequality, Hoeffding's bound for sampling without replacement is used. Now note that for zero-one loss  $\sigma_\ell = 1/2$  and by using (E.9), we have

$$\Pr\{\bar{R} - R \geq \epsilon/8\} \leq \frac{I(U; W|S^{(1)}, S^{(2)}) + 1}{n(\epsilon/8)^2}. \quad (\text{E.14})$$

On the other hand, when  $N \geq \frac{64}{\epsilon^2}$  we also have

$$2e^{-2n(\frac{\epsilon}{8})^2} \leq \frac{1}{n(\epsilon/8)^2}. \quad (\text{E.15})$$

This inequality can be verified for  $N = \frac{64}{\epsilon^2}$ . Which means that it is also valid for larger  $N$ , because l.h.s approaches zero with exponential rate while the r.h.s has slower rate of  $\frac{1}{n}$ .

Finally, we have

$$2e^{-2n(\frac{\epsilon}{8})^2} + \Pr\{\bar{R} - R \geq \epsilon/8\} \leq 2 \times \frac{I(U; W|S^{(1)}, S^{(2)}) + 1}{n(\epsilon/8)^2}, \quad (\text{E.16})$$

which concludes the proof.  $\square$

#### E.4 Conditioning on the Super Sample and Index

Considering Fig. 6, by conditioning on  $J, S^{(1)}, S^{(2)}$ , and processing  $S \rightarrow S_J$  we have

$$|\mathbb{E}[\bar{L} - L]| \leq \mathbb{E}_J[\sqrt{2\sigma_\ell^2 I^J(U_J; W|S^{(1)}, S^{(2)})}] \quad (\text{E.17})$$

$$\leq \sqrt{2\sigma_\ell^2 I(U_J; W|S^{(1)}, S^{(2)}, J)} \quad (\text{E.18})$$

Note that the same argument which was used in Theorem E.2, can be used for datasets with one sample to show that  $\text{gen}(\mu, P_W^S) = 2\mathbb{E}[\bar{L} - L]$ .

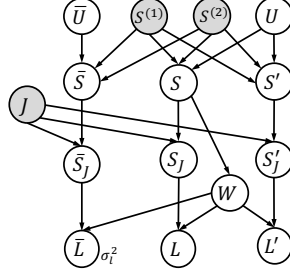

Figure 8: Conditioning on the super sample and index.

## F Proof of Theorem 6

**Definition 1** (Separable process). *The random process  $\{X_t\}_{t \in T}$  is called separable if there is a countable set  $T_0 \subseteq T$  such that  $X_t \in \lim_{\substack{s \rightarrow t \\ s \in T_0}} X_s$  for all  $t \in T$  a.s., where  $x \in \lim_{\substack{s \rightarrow t \\ s \in T_0}} x_s$  means that there is a sequence  $(s_n)$  in  $T_0$  such that  $s_n \rightarrow t$  and  $x_{s_n} \rightarrow x$ .*

**Theorem 6.** *Assume that  $X_{\mathcal{W}} = \{\sqrt{n}\text{gen}(w)\}_{w \in \mathcal{W}}$  is a separable subgaussian process on the bounded metric space  $(\mathcal{W}, d)$  and the learned hypothesis  $W$  is a deterministic function of  $X_{\mathcal{W}}$ . Consider the sequence of functions  $(\Pi_k)_{k=k_1(\mathcal{W})}^{\infty}$  where  $k_1(\mathcal{W})$  is the largest integer that satisfies  $2^{-(k_1(\mathcal{W})-1)} \geq \text{diam}(\mathcal{W})$ , and for all  $k \geq k_1$ ,  $\Pi_k : \mathcal{W} \rightarrow \mathcal{W}$  is a function satisfying  $d(w, \Pi_k(w)) \leq 2^{-k}, \forall w \in \mathcal{W}$ . Define  $\tilde{W}_k = \Pi_k(W)$ , we have*

$$\text{gen}(\mu, P_W^S) \leq \frac{1}{\sqrt{n}} 6\sqrt{2} \sum_{k=k_1(\mathcal{W})}^{\infty} 2^{-k} \sqrt{I(\tilde{W}_k; S)}. \quad (\text{F.1})$$

*Proof.* This result is based on Theorem 11 of [3]. Here it is restated using notations used in current paper.

**Theorem F.1.** *Assume that  $X_{\mathcal{W}} = \{X_w\}_{w \in \mathcal{W}}$  is a separable subgaussian process on the bounded metric space  $(\mathcal{W}, d)$ . Consider the sequence of functions  $(\Pi_k)_{k=k_1(\mathcal{W})}^{\infty}$  where  $k_1(\mathcal{W})$  is the largest integer that satisfies  $2^{-(k_1(\mathcal{W})-1)} \geq \text{diam}(\mathcal{W})$ , and for all  $k > k_1$ ,  $\Pi_k : \mathcal{W} \rightarrow \mathcal{W}$  is a function satisfying  $d(w, \Pi_k(w)) \leq 2^{-k}, \forall w \in \mathcal{W}$ . Define  $\tilde{W}_k = \Pi_k(W)$  for  $k \geq k_1$  and  $\tilde{W}_{k_1-1} = w_0$  for an arbitrary  $w_0 \in \mathcal{W}$ . We have*

$$\mathbb{E}[X_W] \leq 3\sqrt{2} \sum_{k=k_1(\mathcal{W})}^{\infty} 2^{-k} \sqrt{I(\tilde{W}_{k-1}, \tilde{W}_k; X_{\mathcal{W}})}. \quad (\text{F.2})$$

Theorem F.1 is stated for a general random process. In Theorem 6, we used  $X_W = \{\sqrt{n}\text{gen}(w)\}_{w \in \mathcal{W}}$ . Moreover, knowing  $S$ , the values  $\{\sqrt{n}\text{gen}(w)\}_{w \in \mathcal{W}}$  are all deterministically calculated. Thus, by data processing inequality  $I(\tilde{W}_{k-1}, \tilde{W}_k; X_{\mathcal{W}}) \leq I(\tilde{W}_{k-1}, \tilde{W}_k; S)$ . Now the only remained part is

to remove the dependence in  $\tilde{W}_{k-1}$  without resorting to the nested partitioning. We have

$$\begin{aligned}
\mathbb{E}[X_W] &\leq 3\sqrt{2} \sum_{k=k_1}^{\infty} 2^{-k} \sqrt{I(\tilde{W}_{k-1}, \tilde{W}_k; X_{\mathcal{W}})} \\
&= 3\sqrt{2} \sum_{k=k_1}^{\infty} 2^{-k} \sqrt{I(\tilde{W}_k; X_{\mathcal{W}}) + I(\tilde{W}_{k-1}; X_{\mathcal{W}} | \tilde{W}_k)} \\
&\leq 3\sqrt{2} \sum_{k=k_1}^{\infty} 2^{-k} \sqrt{I(\tilde{W}_k; X_{\mathcal{W}}) + I(\tilde{W}_{k-1}; X_{\mathcal{W}})} \tag{F.3}
\end{aligned}$$

$$\leq 3\sqrt{2} \left( \sum_{k=k_1}^{\infty} 2^{-k} \sqrt{I(\tilde{W}_k; X_{\mathcal{W}})} + \sum_{k=k_1}^{\infty} 2^{-k} \sqrt{I(\tilde{W}_{k-1}; X_{\mathcal{W}})} \right) \tag{F.4}$$

$$\begin{aligned}
&\leq 3\sqrt{2} \left( \sum_{k=k_1}^{\infty} 2^{-k} \sqrt{I(\tilde{W}_k; X_{\mathcal{W}})} + \sum_{k=k_1-1}^{\infty} 2^{-(k+1)} \sqrt{I(\tilde{W}_k; X_{\mathcal{W}})} \right) \\
&\leq 3\sqrt{2} \left( \sum_{k=k_1}^{\infty} 2^{-k} \sqrt{I(\tilde{W}_k; X_{\mathcal{W}})} + \sum_{k=k_1-1}^{\infty} 2^{-k} \sqrt{I(\tilde{W}_k; X_{\mathcal{W}})} \right) \\
&\leq 6\sqrt{2} \sum_{k=k_1}^{\infty} 2^{-k} \sqrt{I(\tilde{W}_k; X_{\mathcal{W}})}. \tag{F.5}
\end{aligned}$$

Inequality (F.3) is valid based on Theorem 4 because  $\tilde{W}_{k-1} \perp\!\!\!\perp \tilde{W}_k | X_{\mathcal{W}}$  (which is a consequence of the deterministic relation between  $W$  and  $X_{\mathcal{W}}$ ). In (F.4) we used the mathematical relation  $\sqrt{a+b} \leq \sqrt{a} + \sqrt{b}; \forall a, b \in \mathbb{R}_+$ . In final inequality we used  $I(w_0; X_{\mathcal{W}}) = 0$ , because  $w_0$  is a deterministic value.  $\square$

## G Proof of theorem 7

**Theorem 7.** Suppose  $\mathcal{W}$  has VC-dimension  $d_{(\text{vc})}(\mathcal{W})$  and  $\ell(w, (x, y)) = \mathbb{1}(w(x) \neq y)$ . There is a universal constant  $C$  such that the following bound holds on  $R_U(D)$  defined in (28)

$$R_U(D) \leq C d_{(\text{vc})}(\mathcal{W}) \log\left(\frac{C}{D}\right). \tag{G.1}$$

*Proof.* Note that  $I^{S^{(1)}S^{(2)}}(\tilde{W}_k, S) \leq H(\tilde{W}_k)$ , where  $H(\tilde{W}_k)$  is the entropy of random variable  $\tilde{W}_k$  and is bounded by logarithm of number of possible values it takes. A possible mapping for producing  $\tilde{W}$  is to use centers of a  $D$ -covering. Thus,

$$R^{S^{(1)}S^{(2)}}(D) \leq \log N(\mathcal{W}, d^{S^{(1)}S^{(2)}}, D), \tag{G.2}$$

where  $N(\mathcal{W}, d^{S^{(1)}S^{(2)}}, D)$  is the covering number of  $(\mathcal{W}, d)$  at the scale  $D$ . Recall that  $d^{S^{(1)}S^{(2)}}(w, w') = 2 \|w - w'\|_{L^2(\hat{\mu})}$ . Here  $\hat{\mu}$  is the empirical distribution of the superset and

$$\|w - w'\|_{L^2(\hat{\mu})} = \left[ \frac{1}{n} \sum_{j=1}^n (w(x_j) - w'(x_j))^2 \right]^{1/2}. \tag{G.3}$$

Now we use the following theorem which is based on [10].

**Theorem G.1** (Dudley [10]). *There is a universal constant  $C$  such that*

$$\sup_{\mu} N(\mathcal{W}, \|\cdot\|_{L^2(\mu)}, D) \leq \left(\frac{C}{D}\right)^{C d_{(\text{vc})}(\mathcal{W})}; \quad \forall D < 1.$$

Using this theorem with inequality (G.2) completes the proof.  $\square$
