# Supplementary material
Source: ML conference proceedings conference paper supplement (https://proceedings.neurips.cc/paper_files/paper/2020/hash/befe5b0172188ad14d48c3ebe9cf76bf-Abstract.html)

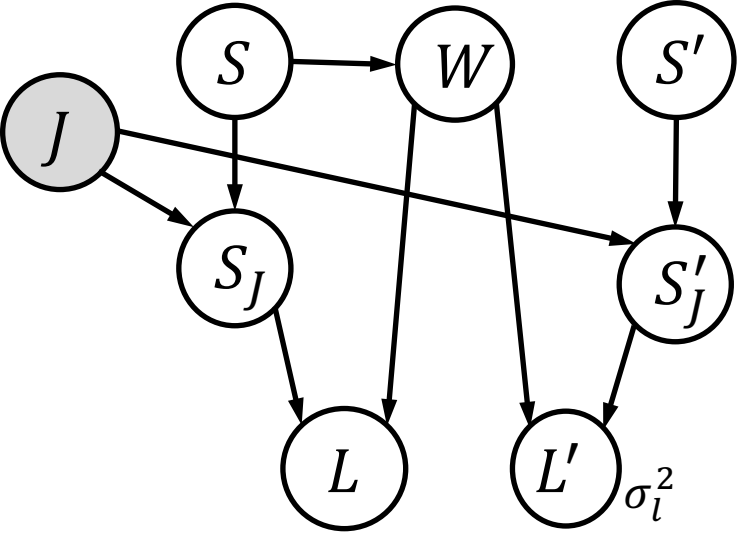

Supplement: Supplementary file [file befe5b0172188ad14d48c3ebe9cf76bf-Supplemental.zip]
